# Supplementary material for: Immunoglobulin M regulates airway hyperresponsiveness independent of T helper 2 allergic inflammation
Source: eLife journal article supplement (doi:10.7554/elife.90531), 2023-09-28
Supplement: fig6-figsupp1-data1 [file Figure_6_-figure_supplement_1_source_data_1.pdf › Figure_6_-figure_supplement_1_source_data_1.pdf]

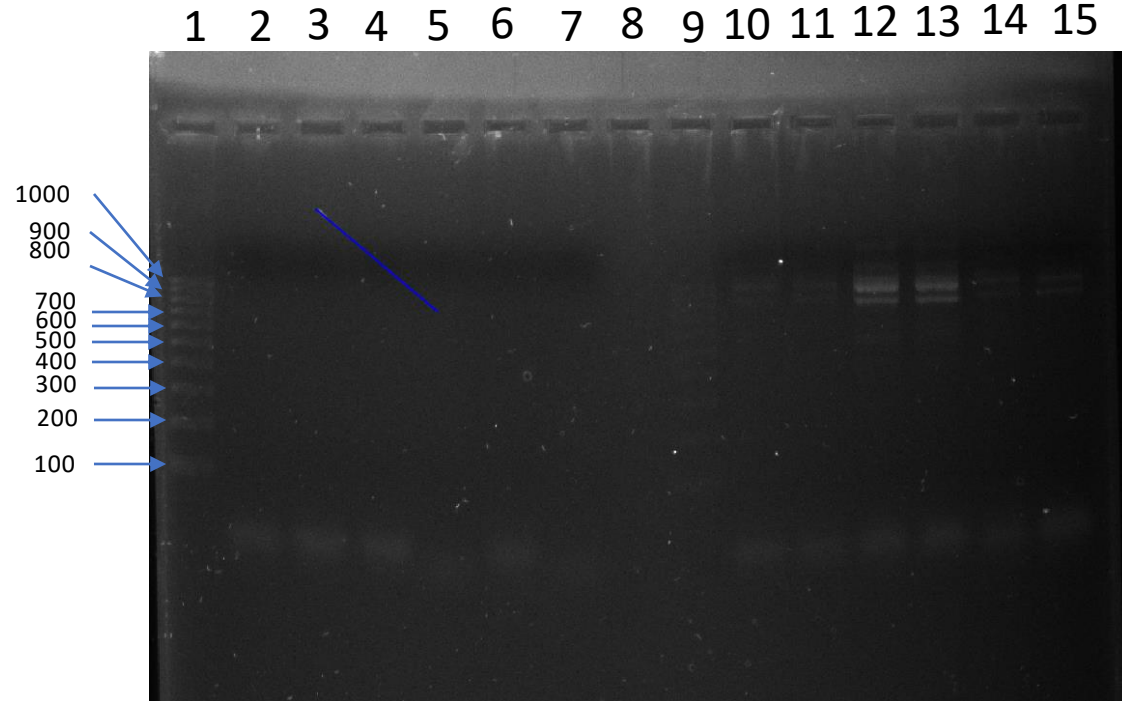

#### Primer set 1

- 1 – DNA ladder 1000bp
- 2 – unstimulated Scramble
- 3 – Unstimulated BAIAP2L1
- 4 – TNF- $\alpha$  Scramble
- 5 – ACh Scramble
- 6 – TNF- $\alpha$  BAIAP2L1
- 7 – ACh BAIAP2L1
- 8 – skipped

#### Primer set 2

- 9 – DNA ladder 1000bp
- 10 – unstimulated Scramble
- 11 – Unstimulated BAIAP2L1
- 12 – TNF- $\alpha$  Scramble
- 13 – ACh Scramble
- 14 – TNF- $\alpha$  BAIAP2L1
- 15 – ACh BAIAP2L1
