# Supplementary figures and images for: Immunoglobulin M regulates airway hyperresponsiveness independent of T helper 2 allergic inflammation
Source: eLife journal article supplement (doi:10.7554/elife.90531), 2023-09-28

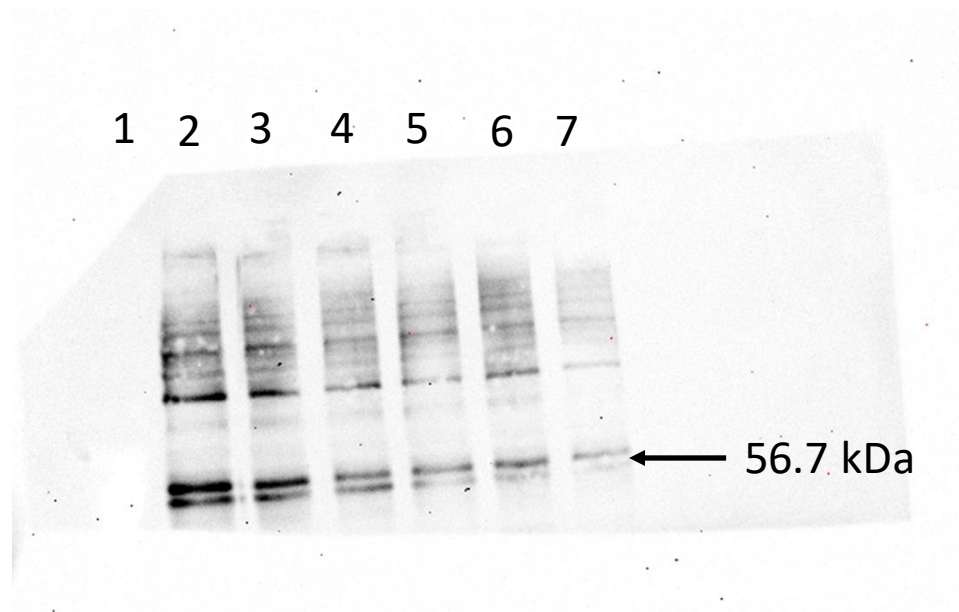

- 1 – PageRuler™ Plus Prestained protein ladder (10-250 kDa)
- 2 – WT HDM 1
- 3 – WT HDM 2
- 4 – WT HDM 3
- 5 – IgM KO HDM 1
- 6 – IgM KO HDM 2
- 7 – IgM KO HDM 3

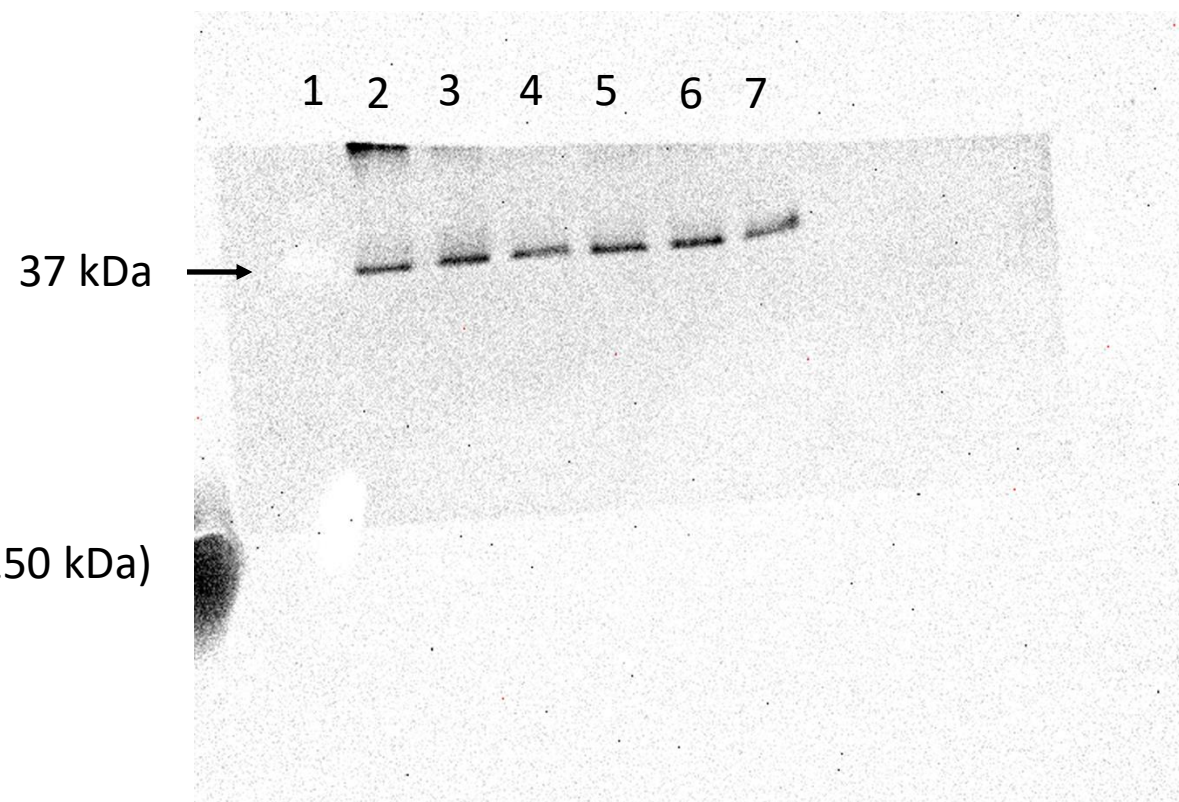

Supplement: fig5-data1 [file Figure_5_-source_data_1.pdf › Figure_5_-source_data_1.pdf]
